# Supplementary material for: A CRISPR Screen of HIV Dependency Factors Reveals That CCNT1 Is Non-Essential in T Cells but Required for HIV-1 Reactivation from Latency
Source: MDPI journal article supplement (doi:10.3390/v15091863), 2023-08-31

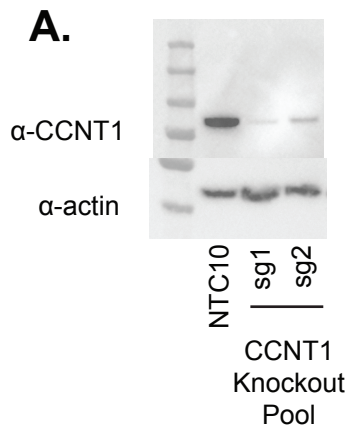

**Supplemental Figure 1:** Supplement to Figure 2. **A.** Above, western blot of non-targeting control (NTC10), and two different guide sequences (sg1 and sg2) targeting the *CCNT1* gene. Knockouts were performed using a lentiviral vector and are pooled knockouts of *CCNT1*. **B.** Below, sequencing chromatogram traces of wild-type and knockouts performed for each gene. Genes of interest were amplified by PCR and sent for sequencing, and analyzed by ICE analysis. Genes are labeled at the top of each chromatograph trace figure. Each line of sequence represents a CRISPR edited gene sample with the wild-type sequence (control) below. The guide sequences used are underlined in the wild-type sequence. ICE scores for each gene knockout are also available in supplemental file.

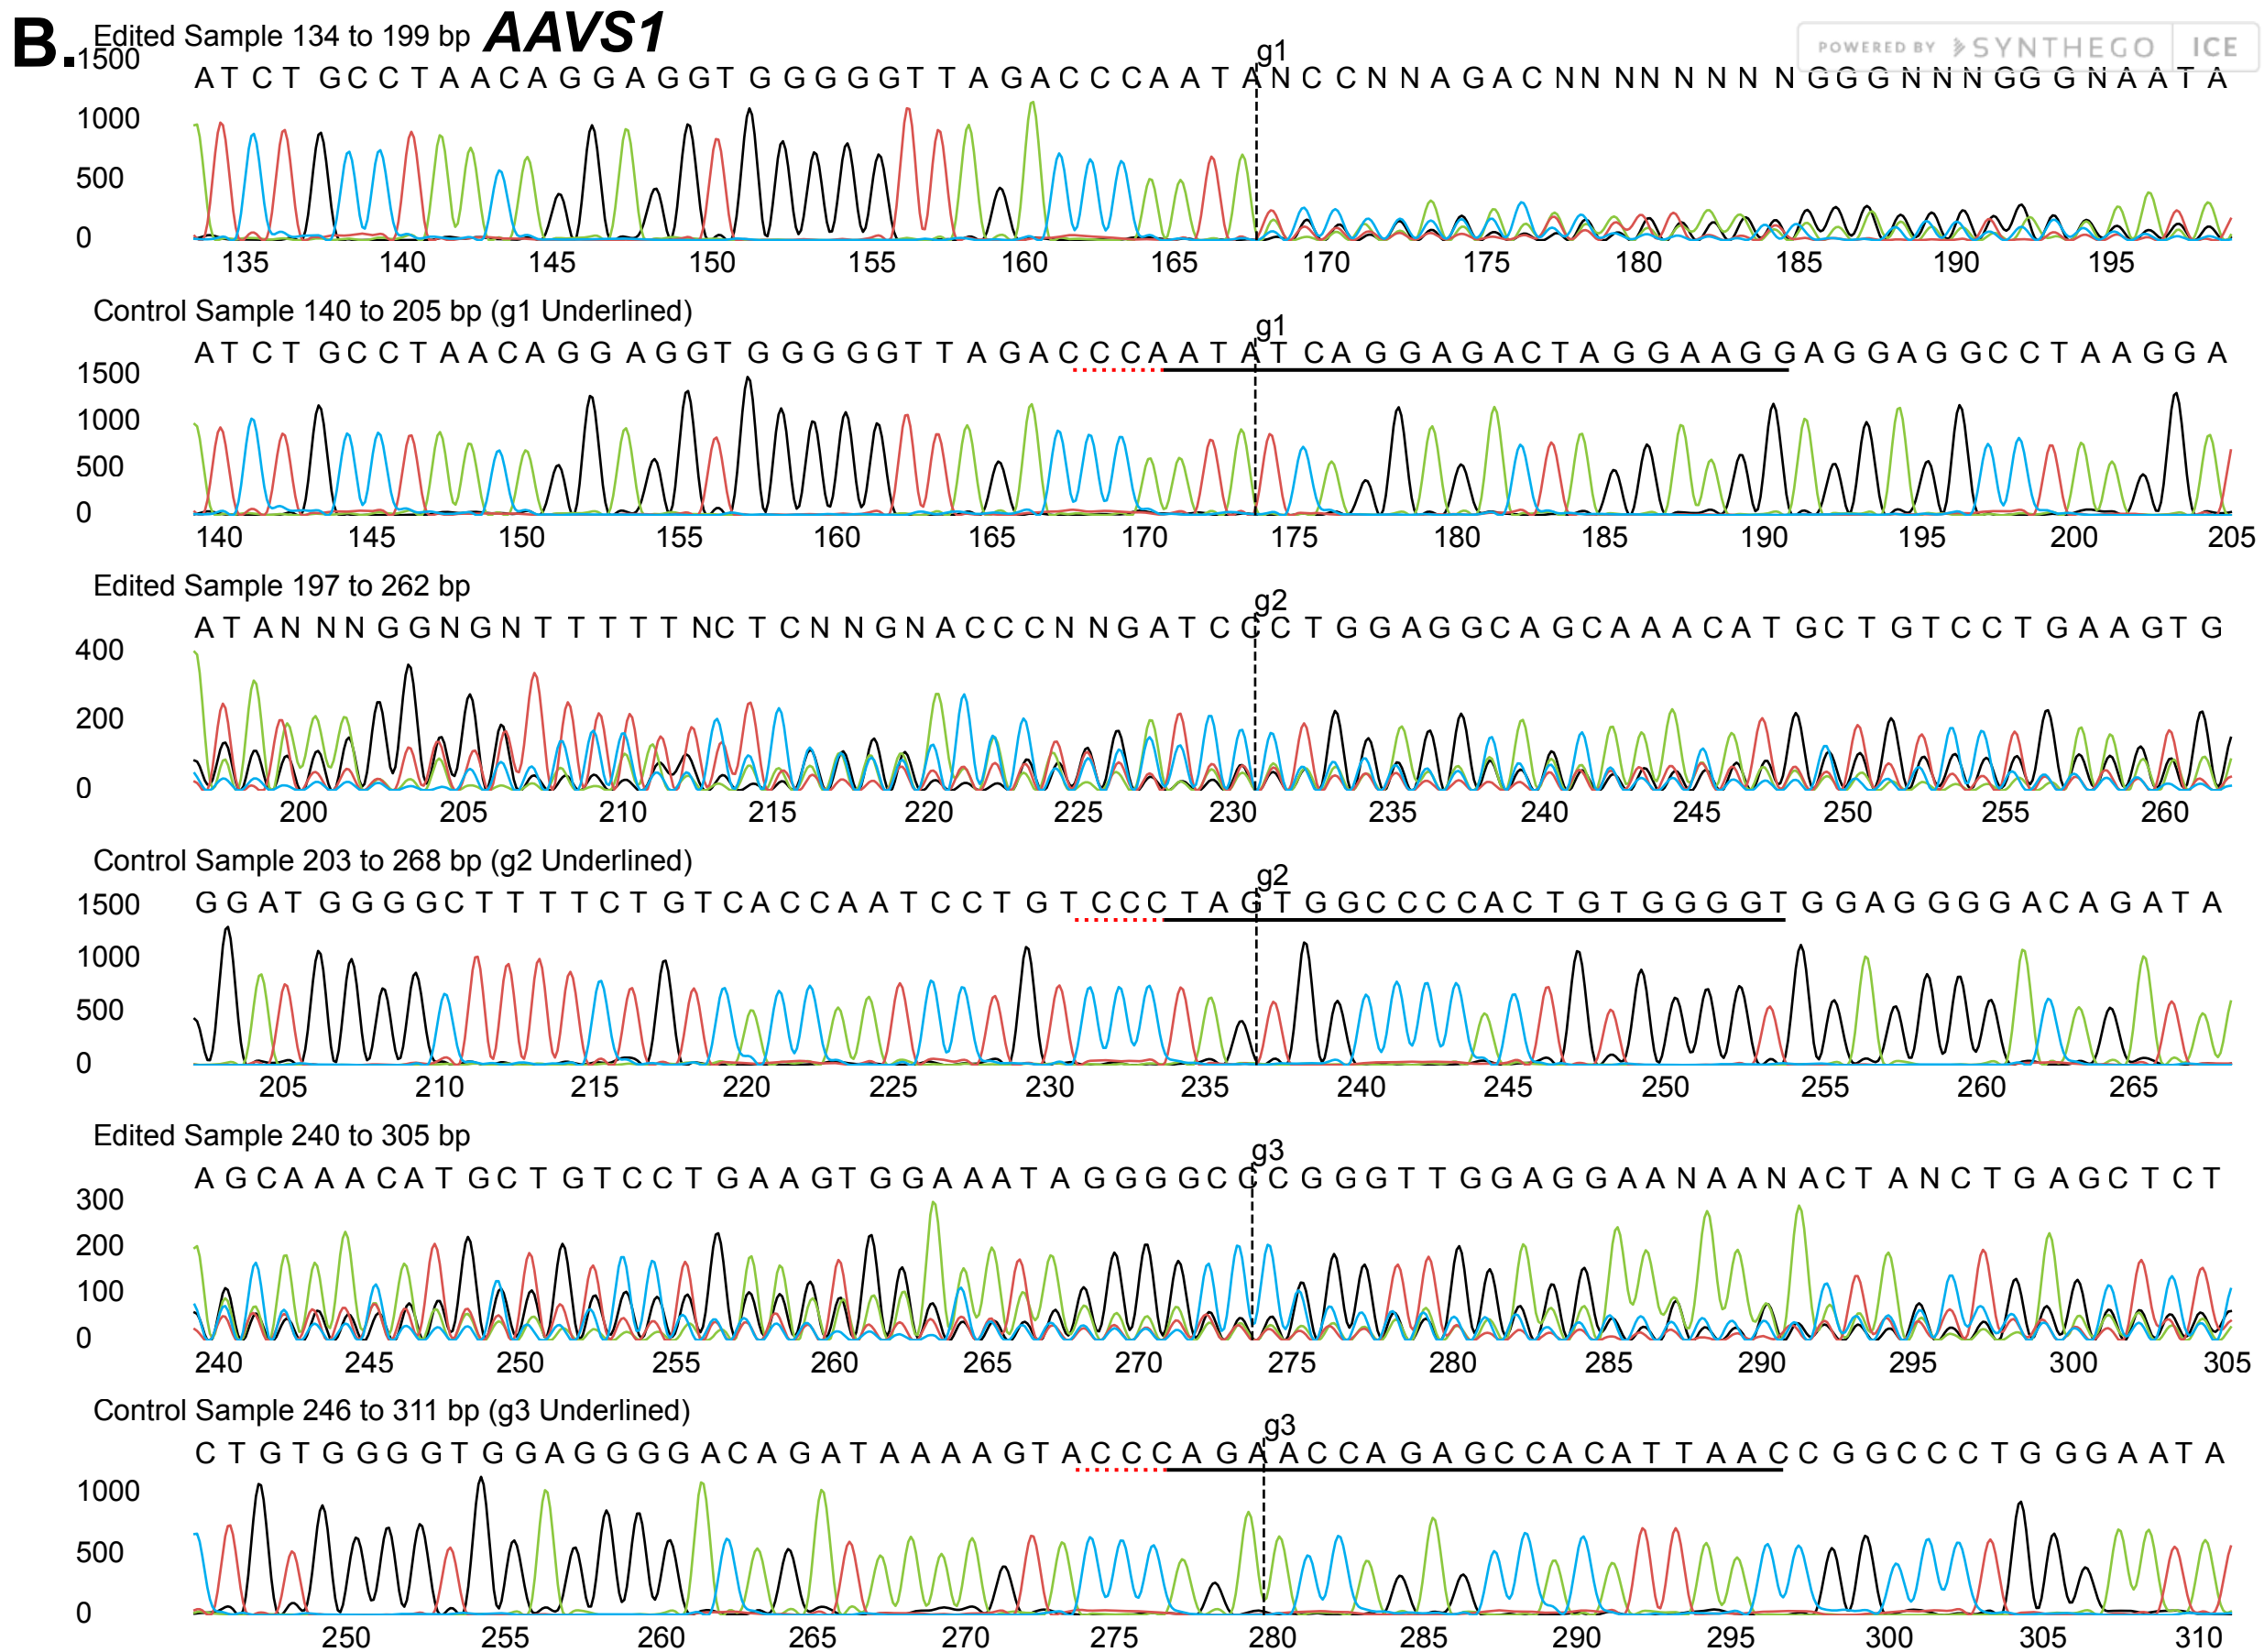

Edited Sample 214 to 279 bp

**ALYREF**

POWERED BY SYNTHEGO

ICE

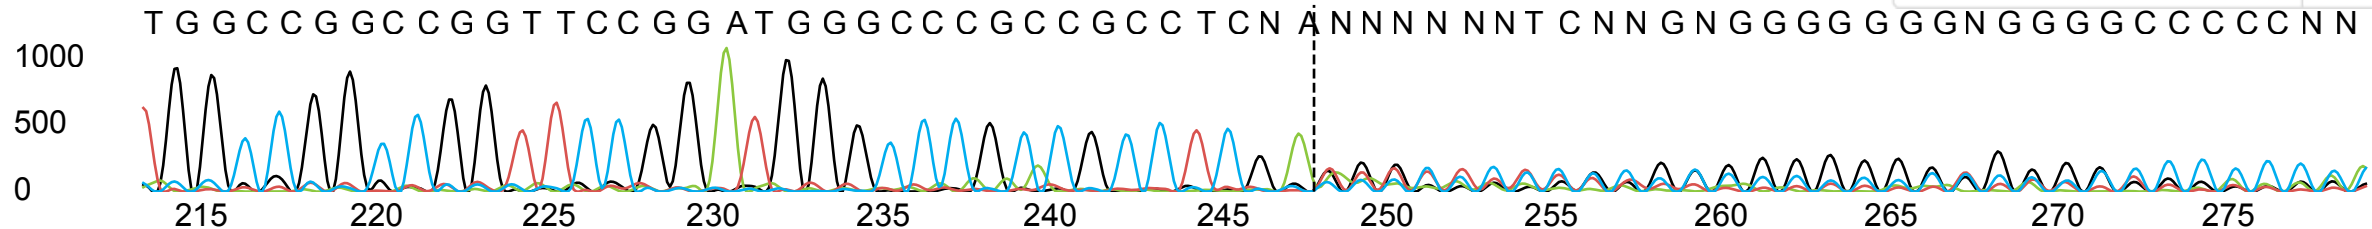

Control Sample 214 to 279 bp

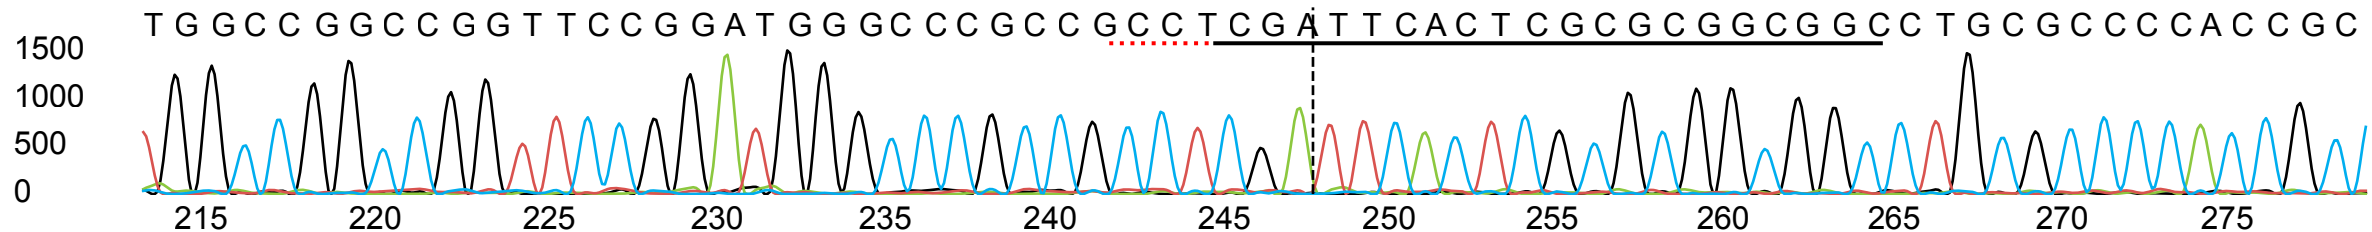

Edited Sample 153 to 218 bp

**AMBRA1**

POWERED BY SYNTHIGO

ICE

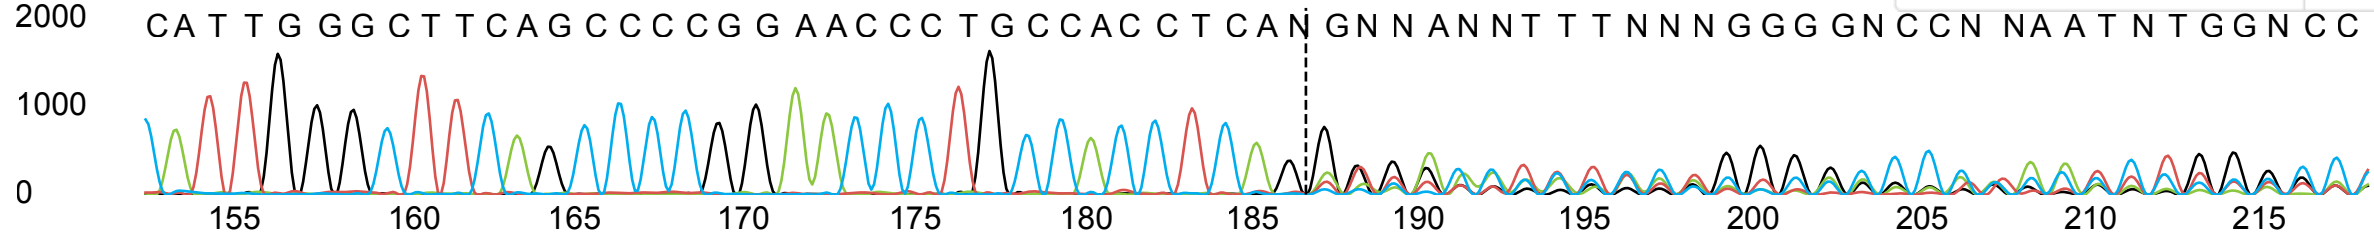

Control Sample 156 to 221 bp

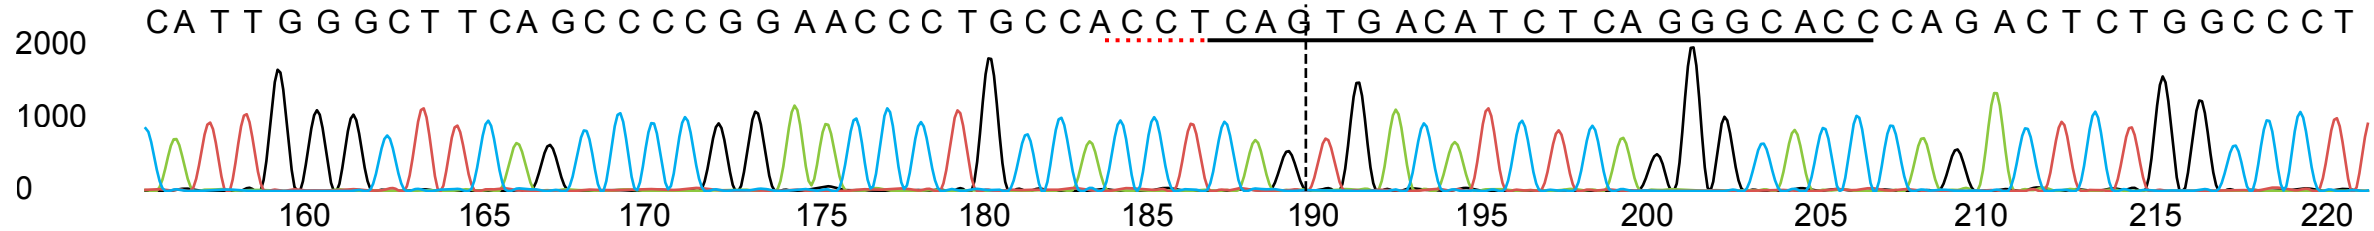

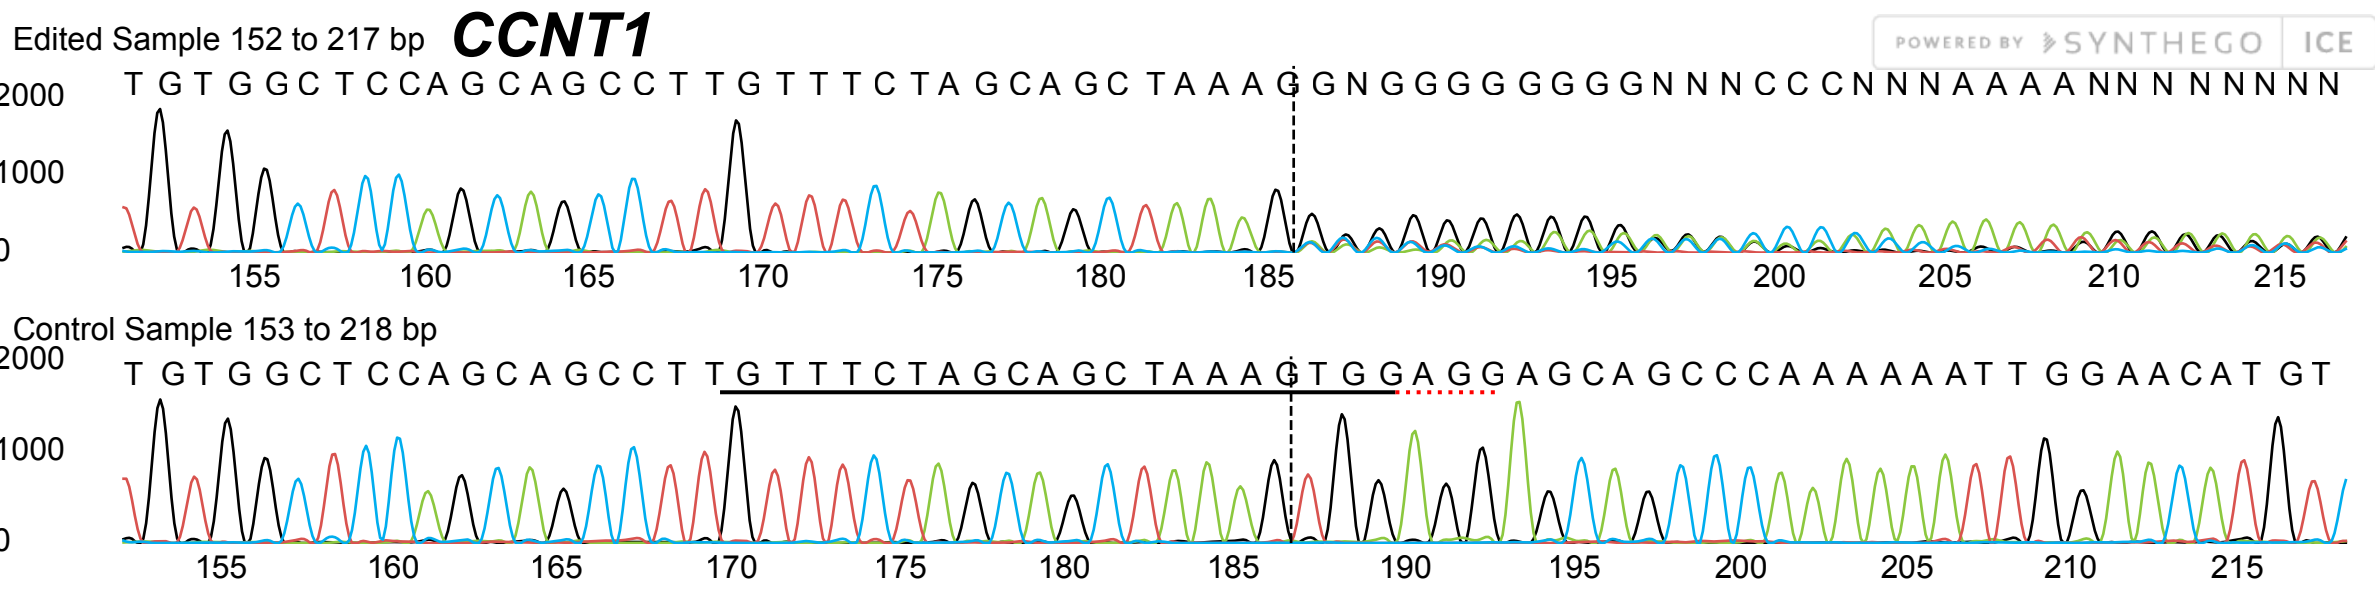

Edited Sample 125 to 190 bp **ELL1**

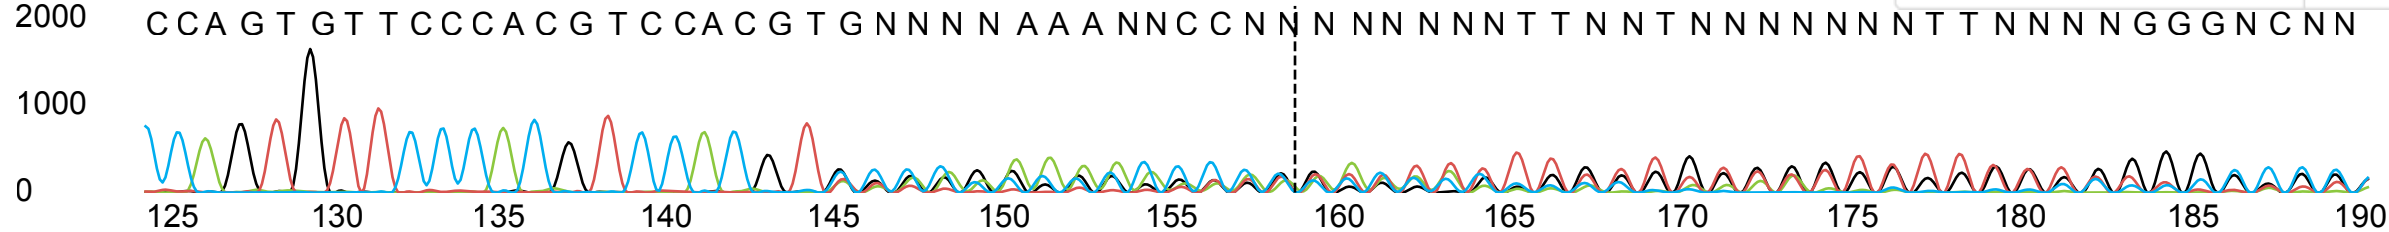

Control Sample 151 to 216 bp

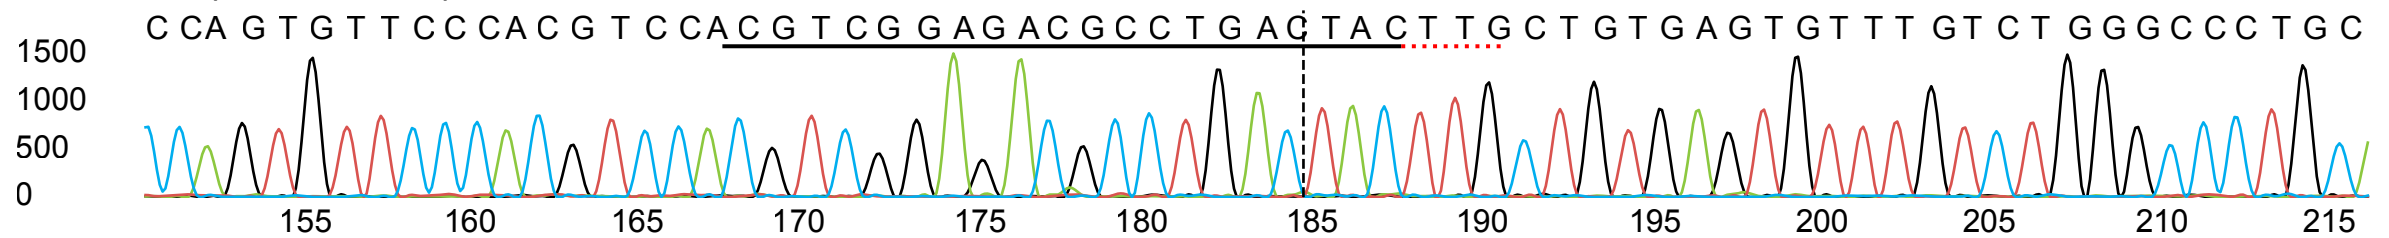

# Edited Sample 81 to 146 bp **HDAC3**

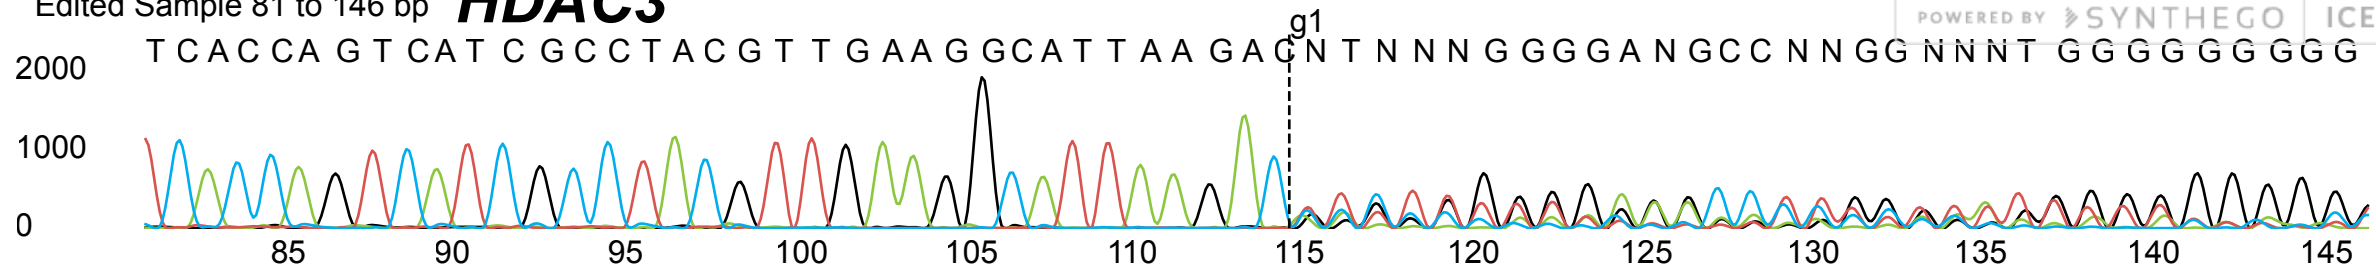

## Control Sample 71 to 136 bp (g1 Underlined)

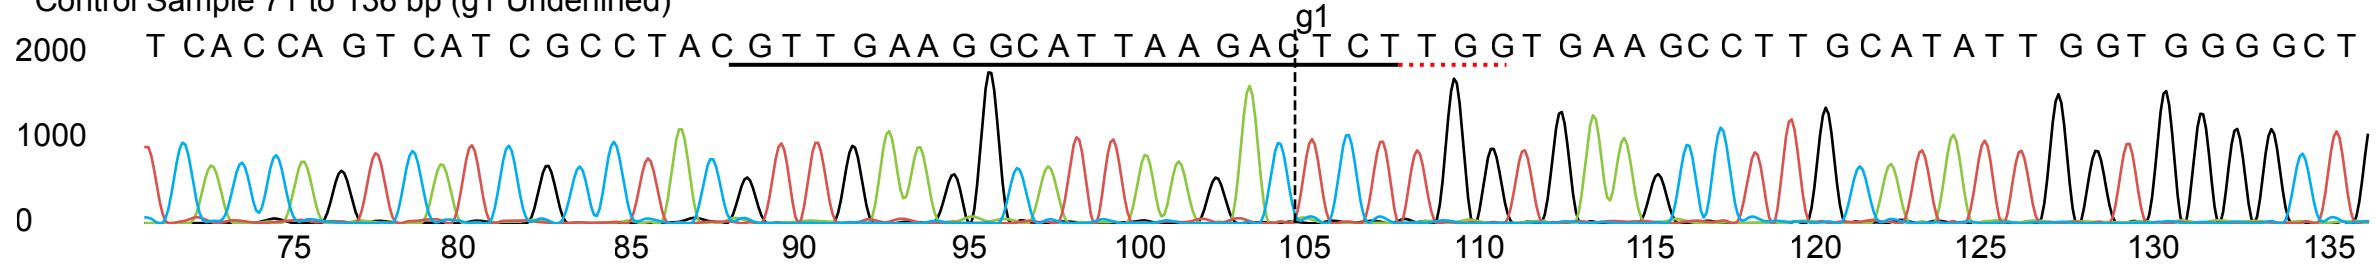

## Edited Sample 143 to 208 bp

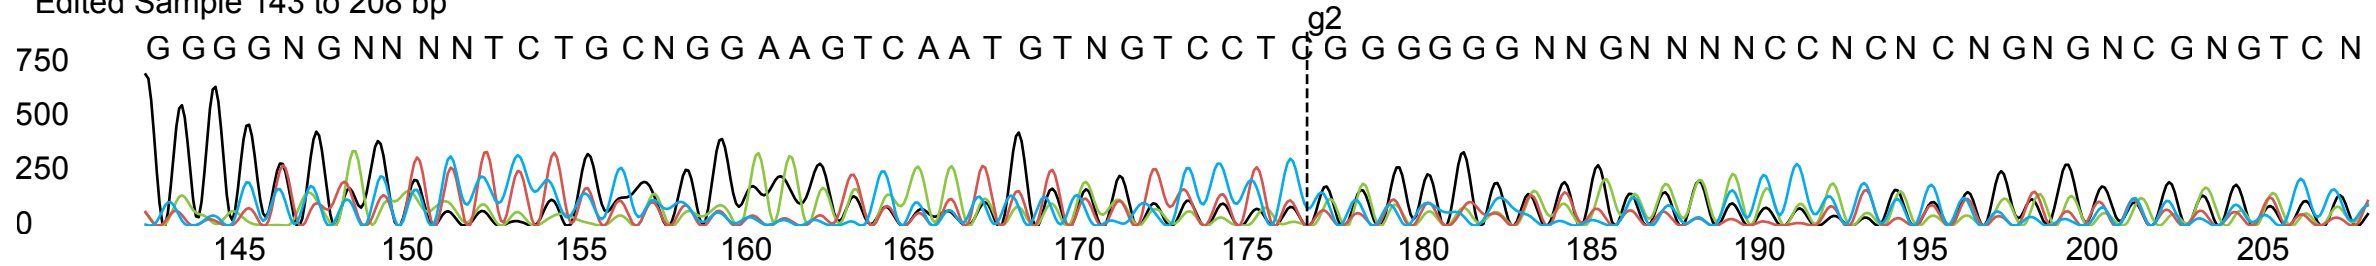

## Control Sample 133 to 198 bp (g2 Underlined)

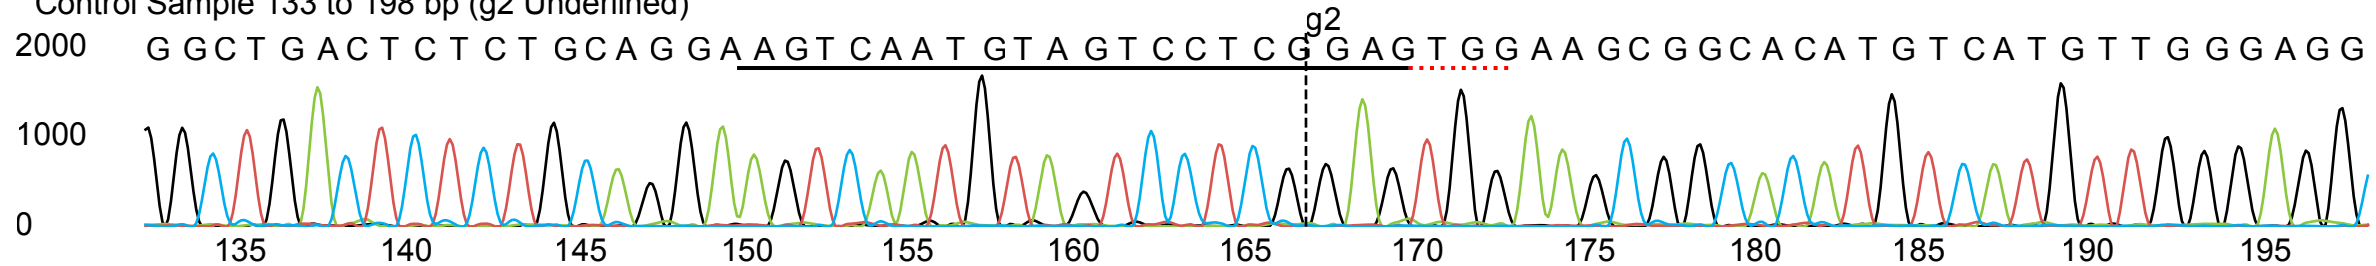

## Edited Sample 179 to 244 bp

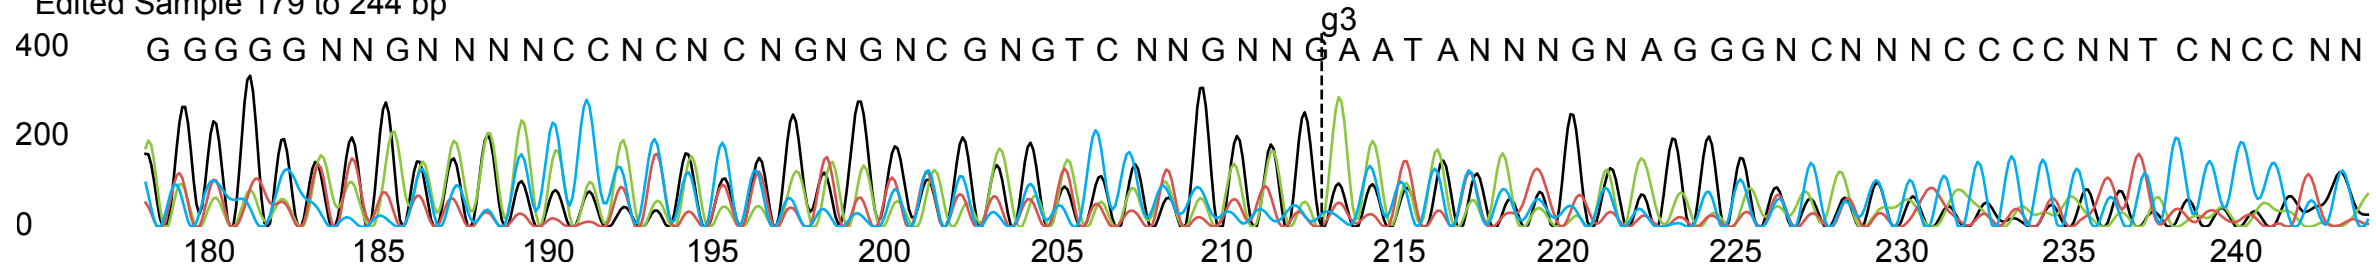

## Control Sample 170 to 235 bp (g3 Underlined)

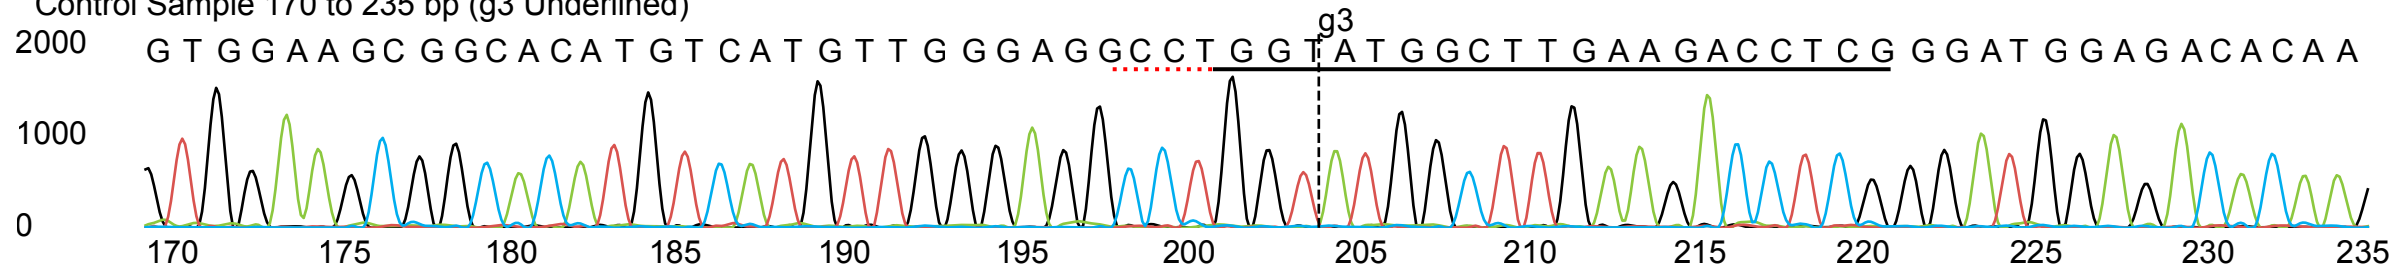

Edited Sample 60 to 125 bp

***SBDS***

POWERED BY SYNTHIGO

ICE

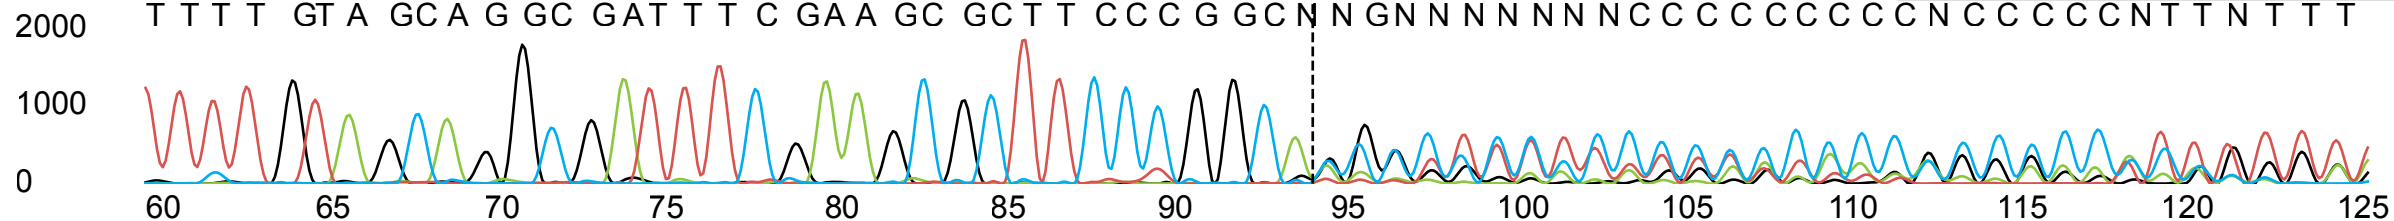

Control Sample 78 to 143 bp

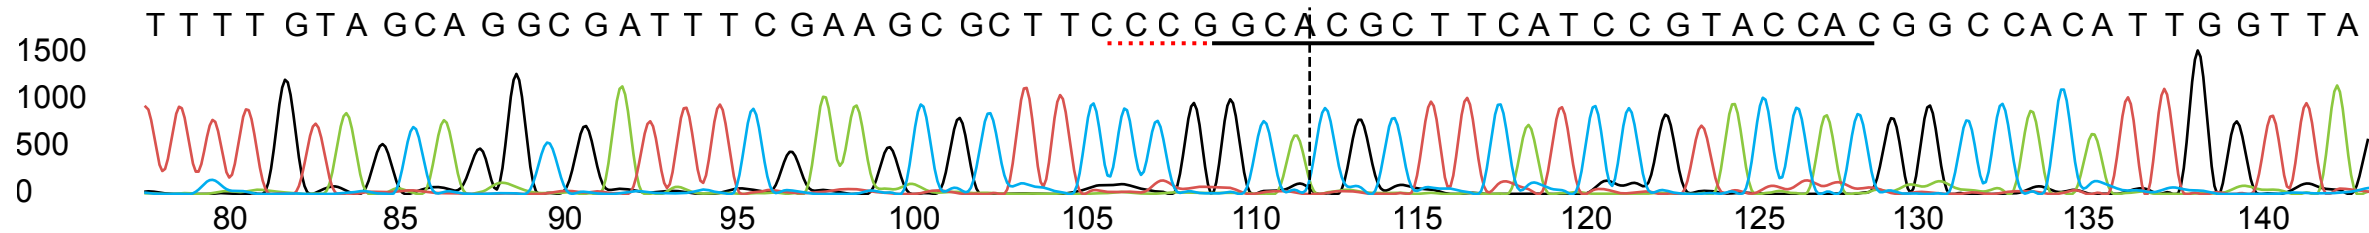



# *TBL1XR1*

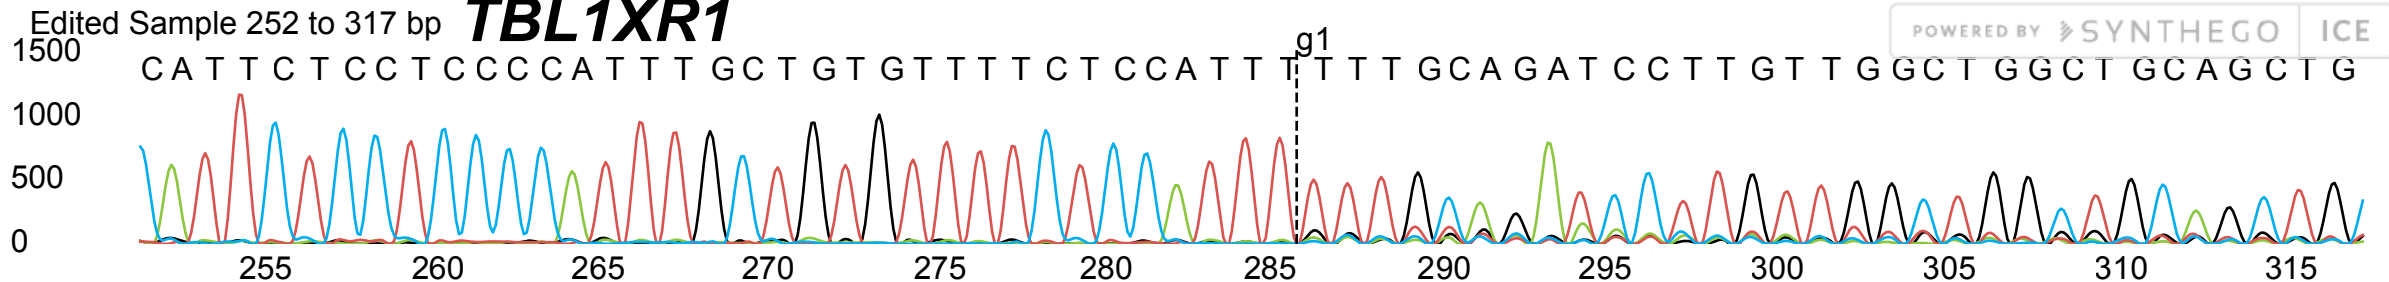

Control Sample 265 to 330 bp (g1 Underlined)

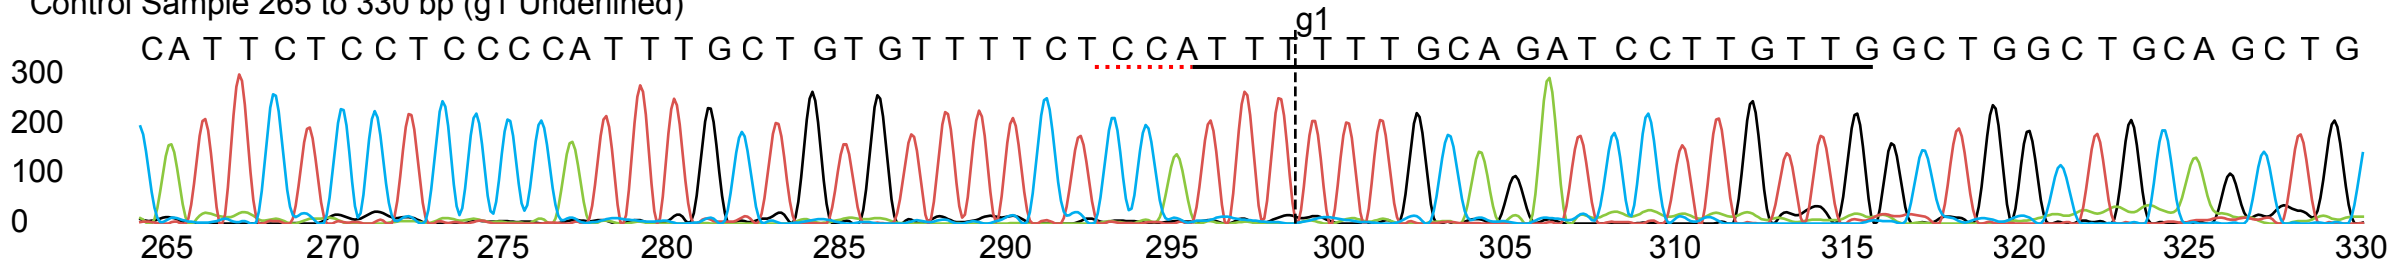

Edited Sample 310 to 375 bp

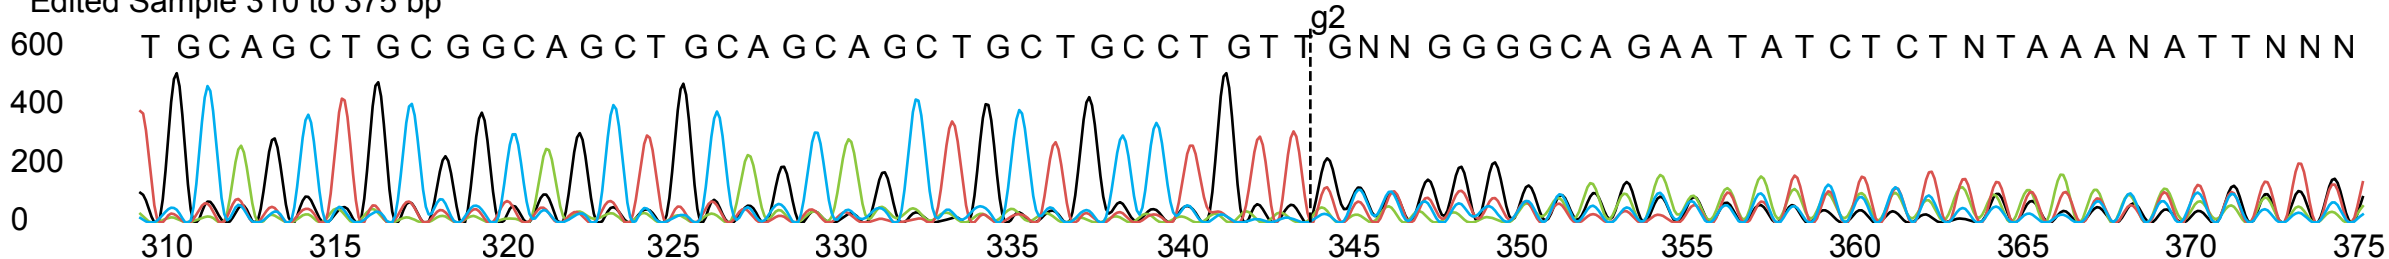

Control Sample 323 to 388 bp (g2 Underlined)

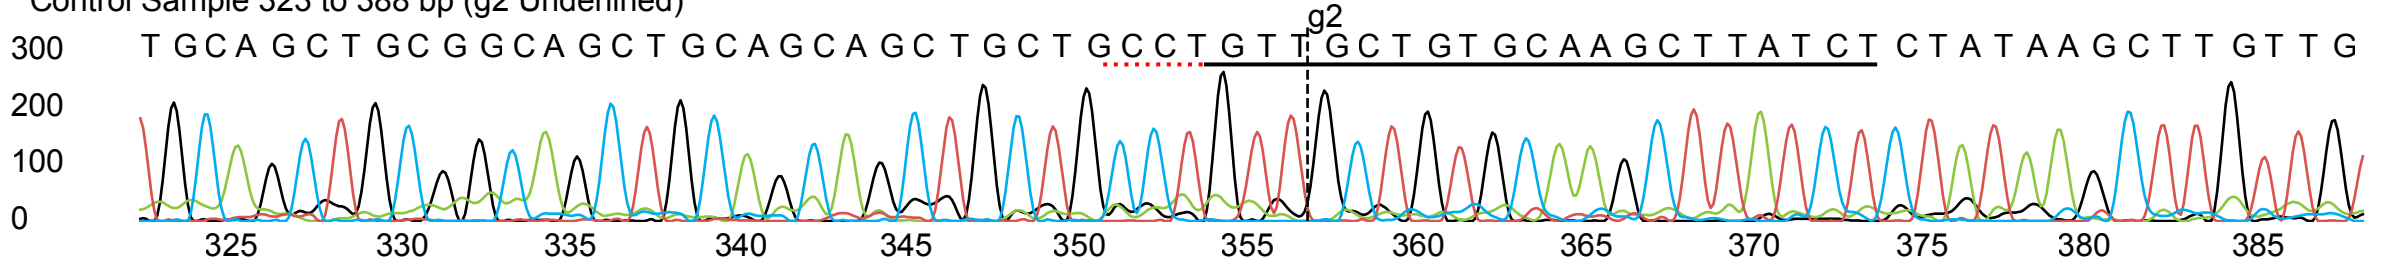

# Edited Sample 129 to 194 bp **UBE2M**

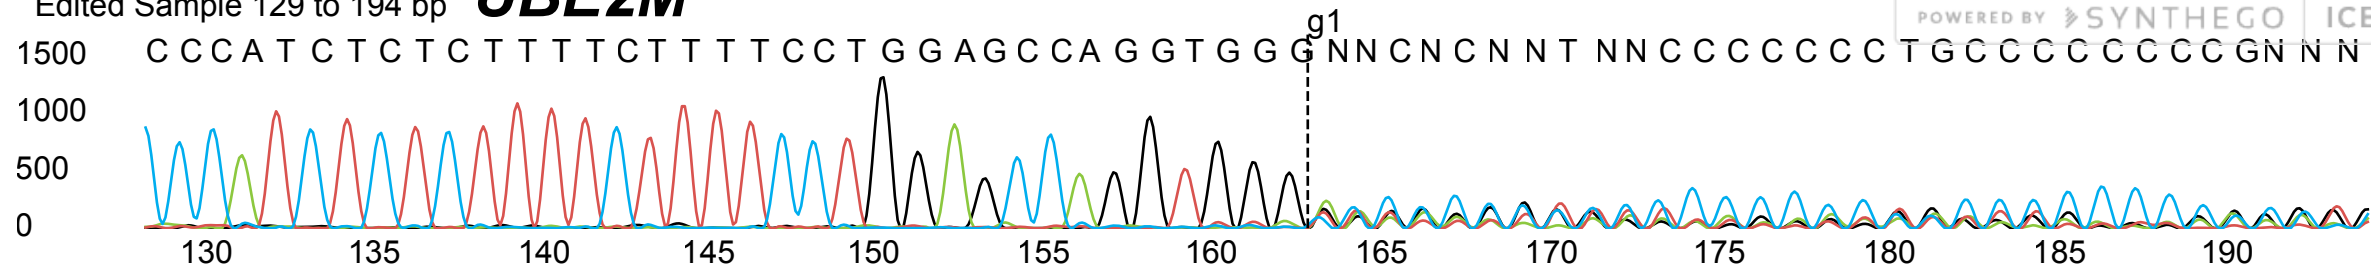

## Control Sample 132 to 197 bp (g1 Underlined)

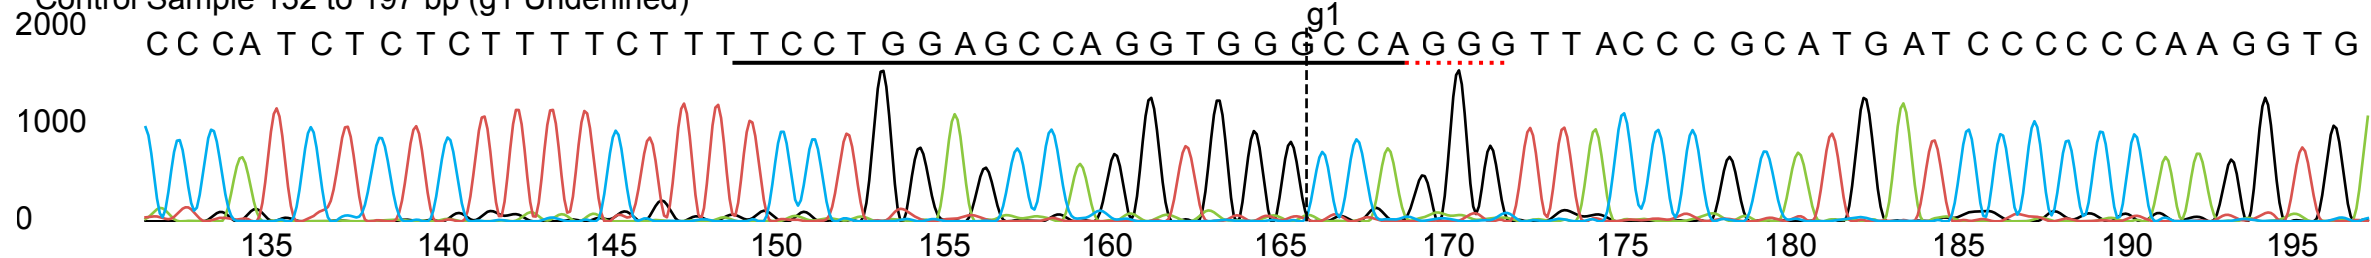

## Edited Sample 191 to 256 bp

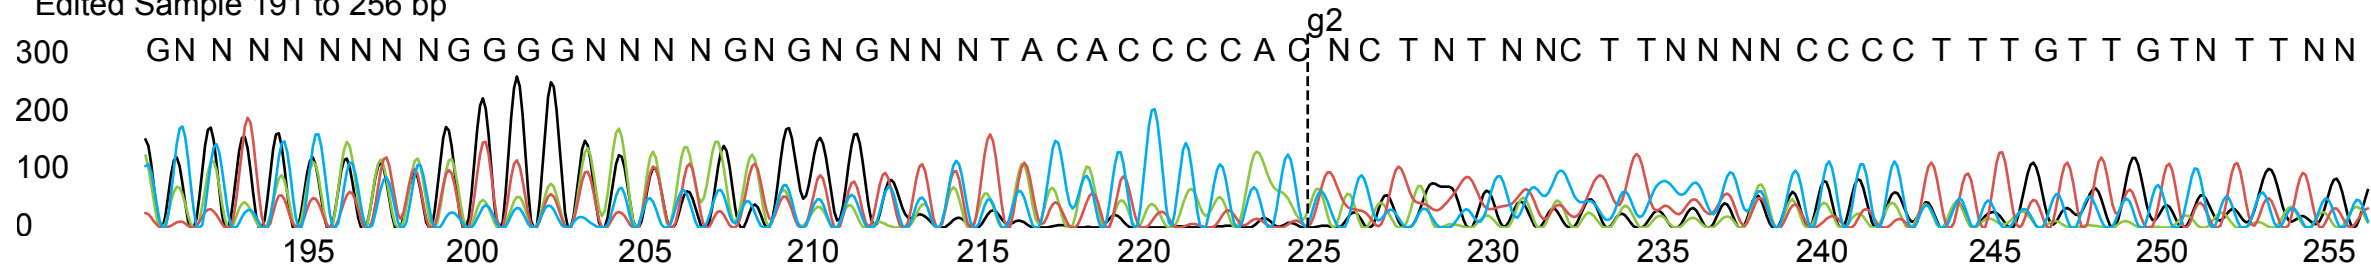

## Control Sample 194 to 259 bp (g2 Underlined)

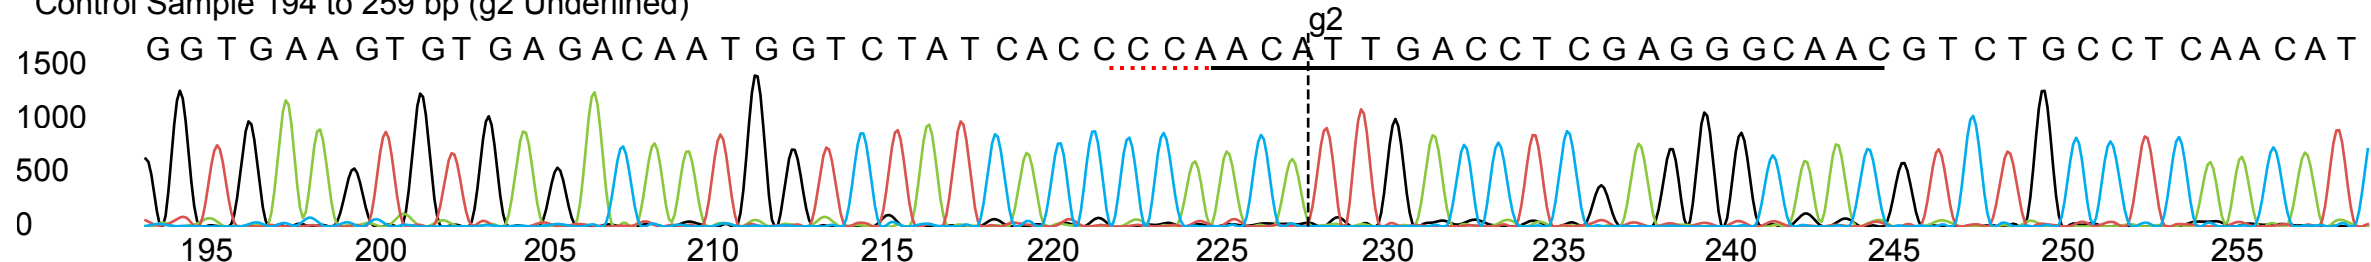

## Edited Sample 247 to 312 bp

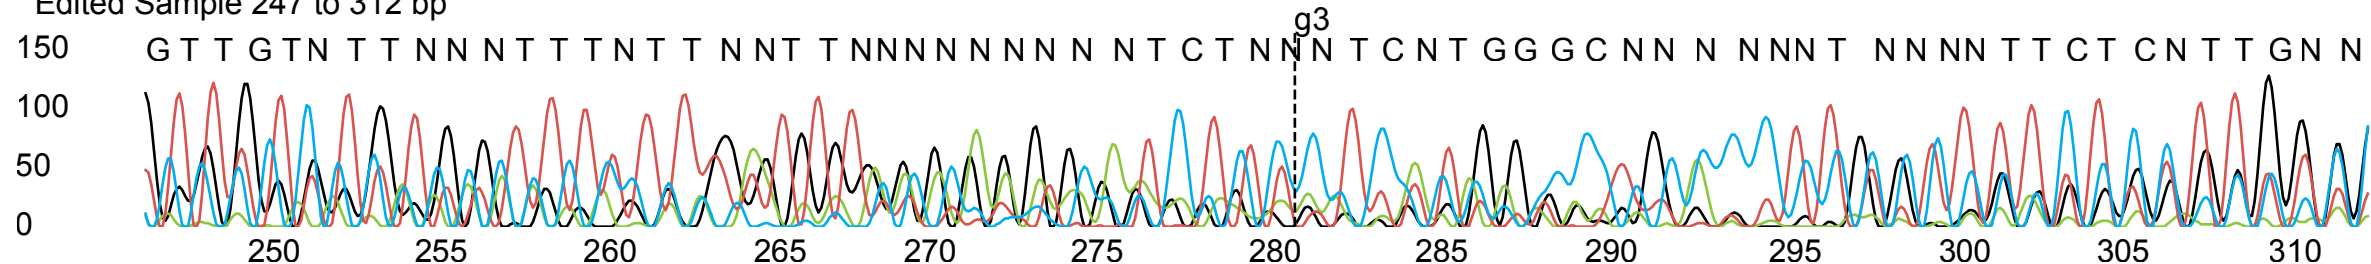

## Control Sample 250 to 315 bp (g3 Underlined)

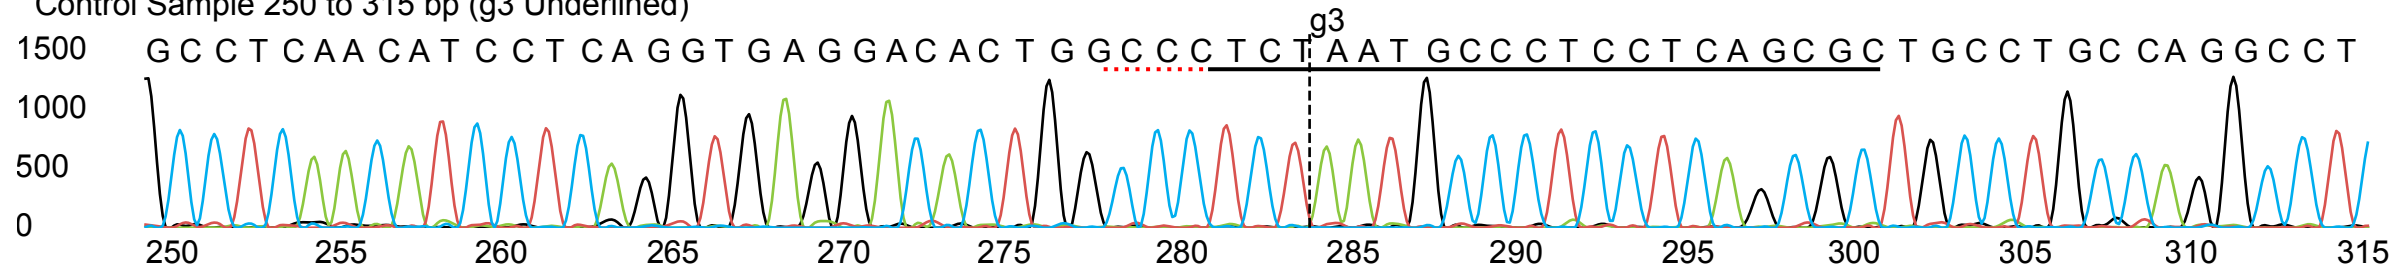

Supplement: s1 [file s1]
