# Supplementary material for: A CRISPR Screen of HIV Dependency Factors Reveals That CCNT1 Is Non-Essential in T Cells but Required for HIV-1 Reactivation from Latency
Source: MDPI journal article supplement (doi:10.3390/v15091863), 2023-08-31
Supplement: s1 [file s1]

**A.**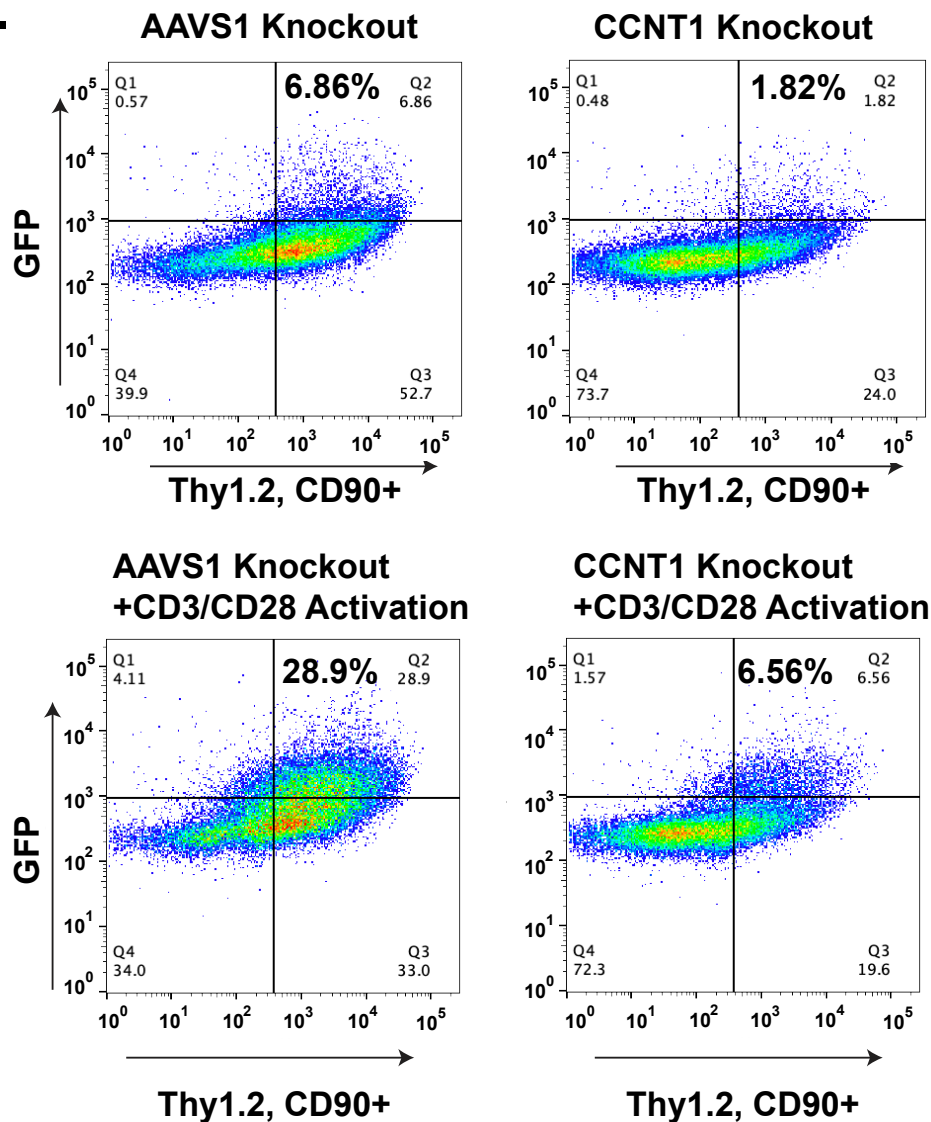

**Supplemental Figure S2: Representative flow gating of primary latency model.** Flow plots are shown from one representative donor. CD4<sup>+</sup> T Cells infected with dual-reporter HIV virus, gene knockouts performed, latency was established, and treated with anti-CD3/anti-CD28 antibodies for 24 hours (see Methods) to assess reactivation potential with T cell receptor co-stimulation.
