# Supplementary material for: A CRISPR Screen of HIV Dependency Factors Reveals That CCNT1 Is Non-Essential in T Cells but Required for HIV-1 Reactivation from Latency
Source: Viruses. 2023 Aug 31;15(9):1863. doi: 10.3390/v15091863 (PMC10535513; doi:10.3390/v15091863)
Supplement: Supplementary file 1 [file viruses-15-01863-s001.zip]

Archive with 10 entries (10 files):
- FigS1.pdf
- __MACOSX/._FigS1.pdf
- FigS2.pdf
- __MACOSX/._FigS2.pdf
- SuppFileS1_v1.xlsx
- __MACOSX/._SuppFileS1_v1.xlsx
- SuppFileS2_v1.xlsx
- __MACOSX/._SuppFileS2_v1.xlsx
- SuppFileS3_v1.xlsx
- __MACOSX/._SuppFileS3_v1.xlsx
