# Supplementary material for: A CRISPR Screen of HIV Dependency Factors Reveals That CCNT1 Is Non-Essential in T Cells but Required for HIV-1 Reactivation from Latency
Source: Viruses. 2023 Aug 31;15(9):1863. doi: 10.3390/v15091863 (PMC10535513; doi:10.3390/v15091863)
Supplement: Supplementary file 1 [file viruses-15-01863-s001.zip › SuppFileS2_v1.xlsx]

## Sheet: Sheet1
Label	ICE	KO-Score	ICE d	R Squared	Mean Discord Before	Mean Discord After	Guide Sequences	Indels
ALYREF_sg1	91	53	76	0.93	0.0944927	0.794864	GCCGCCGCGCGAGTGAATCG	{'0': 2.0, '1': 28.0, '2': 16.0, '3': 22.0, '4': 6.0, '5': 2.0, '6': 13.0, '7': 1.0, '-3': 1.0, '-9': 2.0}
CCNT1	94	69	94	0.94	0.128307	0.792896	GTTTCTAGCAGCTAAAGTGG	{'1': 13.0, '2': 21.0, '3': 20.0, '4': 14.0, '5': 9.0, '6': 5.0, '7': 3.0, '-1': 2.0, '-2': 6.0, '-5': 1.0}
AMBRA1_sg1	95	85	100	0.95	0.128944	0.729555	GGTGCCCTGAGATGTCACTG	{'1': 31.0, '2': 25.0, '3': 8.0, '4': 5.0, '5': 3.0, '6': 2.0, '7': 1.0, '-1': 1.0, '-2': 3.0, '-11': 16.0}
ELL	67	37	82	0.75	0.261044	0.687616	CGTCGGAGACGCCTGACTAC	{'0': 8.0, '1': 8.0, '2': 15.0, '3': 23.0, '4': 1.0, '-3': 5.0, '-9': 2.0, '-29': 3.0, '-30': 1.0, '-33': 2.0, '-34': 1.0, '-37': 4.0, '-38': 2.0}
HDAC3	100	90	91	0.75	0.0419505	0.703871	CGAGGTCTTCAAGCCATACC,AGTCAATGTAGTCCTCGGAG,GTTGAAGGCATTAAGACTCT	{'1': 15.0, '2': 4.0, '3': 7.0, '4': 3.0, '5': 3.0, '6': 2.0, '12': 1.0, '19': 1.0, '-17': 1.0, '-20': 1.0, '-26': 2.0, '-32': 1.0, '-33': 2.0, '-34': 3.0, '-35': 4.0, '-36': 23.0, '-67': 2.0, '-100': 19.0, '-107': 1.0, '-109': 1.0, '-112': 3.0, '-116': 1.0}
AAVS1	99	93	86	0.86	0.164334	0.689185	GTTAATGTGGCTCTGGTTCT,ACCCCACAGTGGGGCCACTA,CCTTCCTAGTCTCCTGATAT	{'0': 1.0, '1': 3.0, '2': 8.0, '3': 2.0, '4': 4.0, '5': 3.0, '6': 3.0, '9': 1.0, '10': 1.0, '-39': 2.0, '-40': 3.0, '-60': 1.0, '-61': 2.0, '-62': 9.0, '-63': 1.0, '-69': 1.0, '-106': 53.0, '-107': 2.0}
SBDS	74	47	65	0.94	0.212933	0.63012	GTGGTACGGATGAAGCGTGC	{'0': 20.0, '1': 28.0, '2': 10.0, '3': 26.0, '4': 7.0, '5': 2.0, '6': 1.0}
UBE2M	100	91	94	0.58	0.12684	0.762499	GCGCTGAGGAGGGCATTAGA,GTTGCCCTCGAGGTCAATGT,TCCTGGAGCCAGGTGGGCCA	{'1': 2.0, '2': 9.0, '3': 6.0, '4': 6.0, '7': 3.0, '-1': 3.0, '-3': 2.0, '13': 1.0, '-10': 1.0, '-17': 1.0, '-18': 1.0, '-57': 2.0, '-59': 1.0, '-61': 6.0, '-64': 4.0, '-65': 3.0, '-66': 3.0, '-73': 1.0, '-119': 3.0, '-122': 3.0, '-123': 5.0, '-124': 2.0, '-125': 1.0, '-130': 1.0, '-132': 2.0, '-134': 2.0, '-135': 3.0, '-136': 2.0, '-137': 1.0, '-141': 3.0, '-162': 17.0}
TBL1XR1	77	60	44	0.93	0.10824	0.688719	AGATAAGCTTGCACAGCAAC,CAACAAGGATCTGCAAAAAA	{'0': 23.0, '1': 15.0, '2': 11.0, '3': 10.0, '4': 4.0, '5': 1.0, '6': 2.0, '-2': 2.0, '-3': 1.0, '-9': 1.0, '15': 1.0, '-11': 1.0, '-13': 1.0, '-15': 1.0, '-18': 1.0, '-19': 2.0, '-22': 2.0, '-30': 8.0, '-32': 9.0, '-66': 4.0}
