# Supplementary material for: A CRISPR Screen of HIV Dependency Factors Reveals That CCNT1 Is Non-Essential in T Cells but Required for HIV-1 Reactivation from Latency
Source: Viruses. 2023 Aug 31;15(9):1863. doi: 10.3390/v15091863 (PMC10535513; doi:10.3390/v15091863)
Supplement: Supplementary file 1 [file viruses-15-01863-s001.zip › SuppFileS3_v1.xlsx]

## Sheet: ICE_PrimaryRNAseq
Label	ICE	KO-Score	KI-Score	ICE d	R Squared	Mean Discord Before	Mean Discord After	Guide Sequences	Edit Sample Quality Score	Indels
DonorA_AAVS1KO_Rep1	100	98		89	0.85	0.112764	0.810312	CCTTCCTAGTCTCCTGATAT,ACCCCACAGTGGGGCCACTA,GTTAATGTGGCTCTGGTTCT		{'6': 1.0, '-7': 1.0, '-9': 1.0, '16': 2.0, '-40': 1.0, '-42': 24.0, '-43': 8.0, '-44': 28.0, '-45': 3.0, '-62': 1.0, '-64': 13.0, '-79': 1.0, '-107': 16.0}
DonorA_AAVS1KO_Rep2	94	93		86	0.89	0.114342	0.779372	CCTTCCTAGTCTCCTGATAT,ACCCCACAGTGGGGCCACTA,GTTAATGTGGCTCTGGTTCT		{'0': 6.0, '1': 1.0, '-6': 1.0, '-7': 3.0, '-42': 39.0, '-43': 33.0, '-44': 2.0, '-64': 10.0, '-107': 5.0}
DonorA_CCNT1KO_Rep1	93	90		58	0.94	0.051636	0.58569	GAAGCACTATGGAGGGAGAG,AATAGCCCATCCCGTCGTTT,GCAGGCGGCCAATCTGCTTC		{'0': 7.0, '1': 10.0, '7': 1.0, '-1': 2.0, '-4': 4.0, '-6': 3.0, '-7': 1.0, '-57': 5.0, '-68': 47.0, '-124': 20.0}
DonorA_CCNT1KO_Rep2	95	93		61	0.93	0.0462518	0.596177	GAAGCACTATGGAGGGAGAG,AATAGCCCATCCCGTCGTTT,GCAGGCGGCCAATCTGCTTC		{'0': 5.0, '1': 3.0, '5': 1.0, '7': 2.0, '-1': 2.0, '-3': 2.0, '-4': 3.0, '-7': 3.0, '-8': 2.0, '-13': 2.0, '-57': 3.0, '-68': 49.0, '-69': 2.0, '-124': 21.0}
DonorB_AAVS1KO_Rep1	93	93		84	0.88	0.0963004	0.82796	CCTTCCTAGTCTCCTGATAT,ACCCCACAGTGGGGCCACTA,GTTAATGTGGCTCTGGTTCT		{'0': 7.0, '1': 3.0, '-42': 34.0, '-43': 13.0, '-44': 18.0, '-64': 11.0, '-65': 2.0, '-107': 12.0}
DonorB_AAVS1KO_Rep2	96	96		86	0.85	0.0665609	0.838211	CCTTCCTAGTCTCCTGATAT,ACCCCACAGTGGGGCCACTA,GTTAATGTGGCTCTGGTTCT		{'0': 4.0, '1': 2.0, '-2': 1.0, '-7': 1.0, '16': 2.0, '-42': 30.0, '-43': 38.0, '-64': 5.0, '-77': 1.0, '-107': 16.0}
DonorB_CCNT1KO_Rep1	96	96		64	0.82	0.0458115	0.624597	GAAGCACTATGGAGGGAGAG,AATAGCCCATCCCGTCGTTT,GCAGGCGGCCAATCTGCTTC		{'0': 4.0, '1': 23.0, '2': 5.0, '8': 2.0, '-7': 1.0, '-20': 1.0, '-21': 2.0, '-23': 1.0, '-24': 2.0, '-32': 4.0, '-67': 27.0, '-69': 12.0, '-70': 1.0, '-74': 1.0, '-85': 2.0, '-103': 3.0, '-125': 1.0, '-154': 8.0}
DonorB_CCNT1KO_Rep2	95	93		61	0.86	0.0537457	0.625216	GAAGCACTATGGAGGGAGAG,AATAGCCCATCCCGTCGTTT,GCAGGCGGCCAATCTGCTTC		{'0': 5.0, '1': 8.0, '-1': 1.0, '-4': 1.0, '-5': 5.0, '-7': 3.0, '-8': 1.0, '18': 2.0, '-13': 4.0, '-14': 6.0, '-20': 1.0, '-57': 6.0, '-67': 3.0, '-68': 29.0, '-69': 11.0, '-70': 4.0, '-125': 10.0}
DonorC_AAVS1KO_Rep1	93	93		87	0.77	0.13327	0.745978	CCTTCCTAGTCTCCTGATAT,ACCCCACAGTGGGGCCACTA,GTTAATGTGGCTCTGGTTCT		{'0': 7.0, '-2': 2.0, '-42': 27.0, '-44': 35.0, '-64': 6.0, '-71': 1.0, '-76': 2.0, '-79': 3.0, '-83': 1.0, '-107': 16.0}
DonorC_CCNT1KO_Rep1	97	97		70	0.77	0.151177	0.683224	GAAGCACTATGGAGGGAGAG,AATAGCCCATCCCGTCGTTT,GCAGGCGGCCAATCTGCTTC		{'0': 3.0, '1': 3.0, '-1': 1.0, '-57': 4.0, '-69': 71.0, '-124': 7.0, '-125': 11.0}
